# Supplementary material for: Average orientation of a fluoroaromatic molecule in lipid bilayers from DFT-informed NMR measurements of 1H–19F dipolar couplings
Source: Royal Society of Chemistry journal article supplement (doi:10.1039/c8cp01064a), 2018-01-01
Supplement: c8cp01064a1.pdf [file c8cp01064a1.pdf]

**Supplementary Figures for:**

**Average orientation of a fluoroaromatic molecule in lipid bilayers  
from DFT-informed NMR measurements of  $^1\text{H}$ - $^{19}\text{F}$  dipolar couplings**

Eleri Hughes, John Griffin, Michael P. Coogan and David A. Middleton

Department of Chemistry, Lancaster University, Lancaster, United Kingdom LA1 4YB

Corresponding author:

David A. Middleton

E-mail: [d.middleton@lancaster.ac.uk](mailto:d.middleton@lancaster.ac.uk)

Telephone: +44 1524 594328

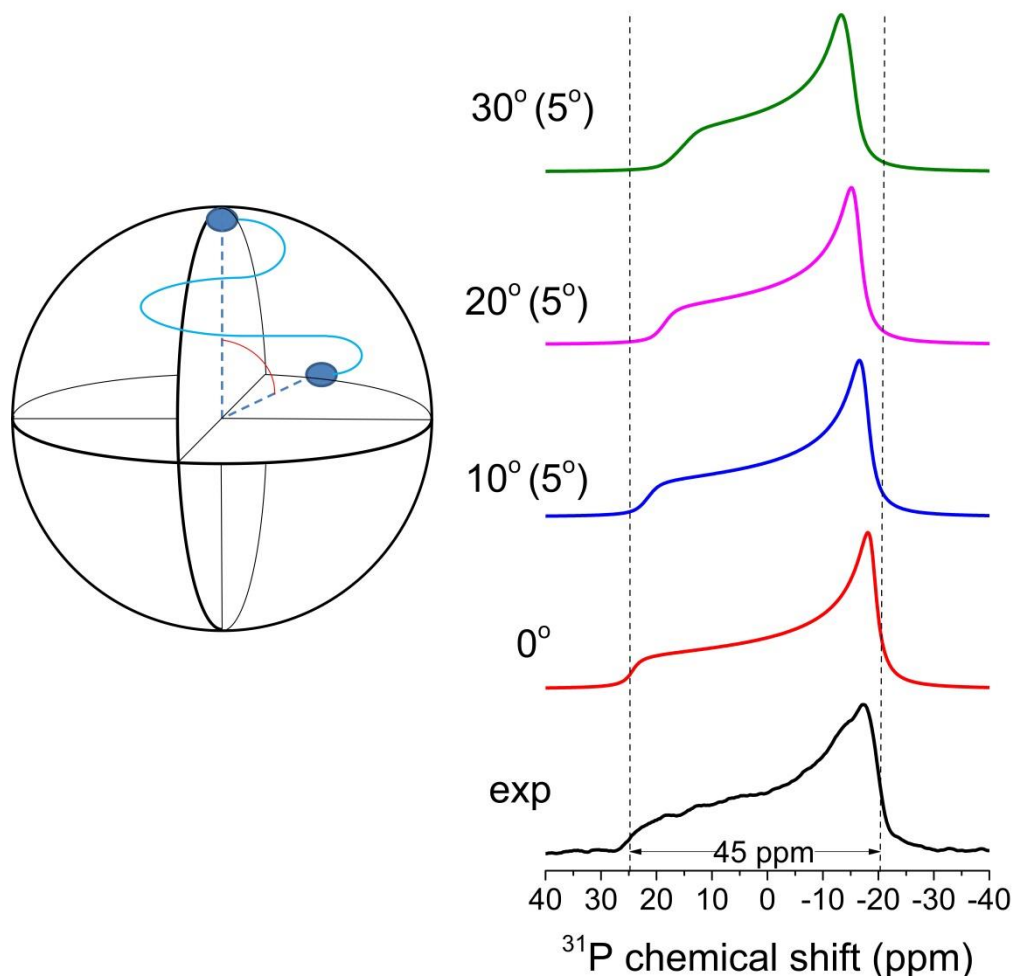

Figure S1. Experimental (black)  $^{31}\text{P}$  powder pattern of DMPC bilayers containing FBTA (20:1 molar ratio of lipid to drug) at  $30^\circ\text{C}$ . The full-width anisotropy of 45.2 ppm is typical for rotational averaging of the DMPC  $^{31}\text{P}$  chemical shift tensor within multilamellar vesicles. The coloured spectra are simulations representing different angular excursions of the lipids (mean  $\pm$  a standard deviation of  $5^\circ$ ) from an initial position as a result of rapid lateral diffusion or vesicle tumbling (left diagram). Even relatively a small angular excursion of  $10^\circ$  gives rise to measureable narrowing of the powder line width, and further displacements also cause a distortion of the powder line shape. Hence lateral diffusion and vesicle tumbling do not influence the  $^{31}\text{P}$  line shape for the mixed DMPC/FBTA system.

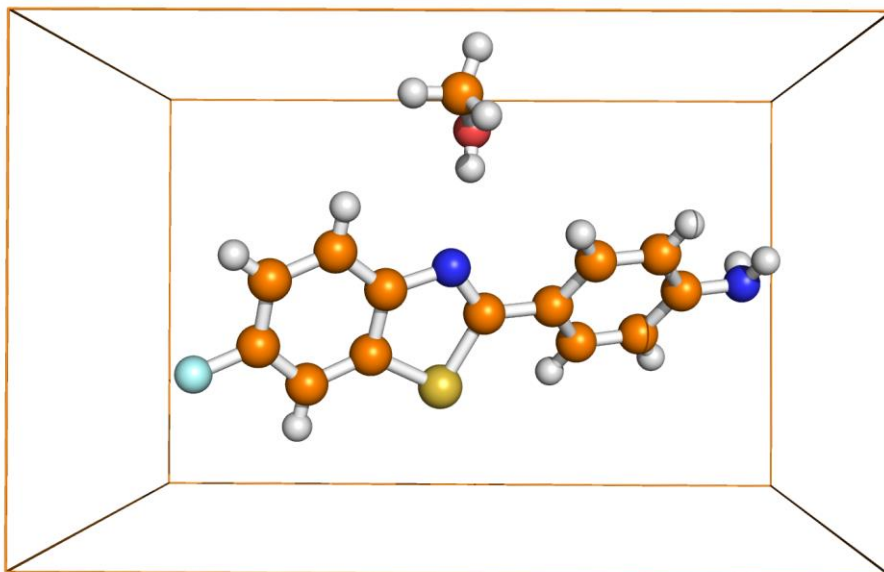

Figure S2. X-ray crystal structure of the methanol solvate of FBTA,  $C_{14}H_{13}FN_2OS$  ( $M=276.32$  g/mol): orthorhombic, space group  $Pbca$  (no. 61),  $a = 9.54533(14)$  Å,  $b = 14.9685(2)$  Å,  $c = 17.9615(3)$  Å,  $V = 2566.33(7)$  Å<sup>3</sup>,  $Z = 8$ ,  $T = 100.01(10)$  K,  $\mu(\text{CuK}\alpha) = 2.302$  mm<sup>-1</sup>,  $D_{\text{calc}} = 1.430$  g/cm<sup>3</sup>, 21876 reflections measured ( $9.848^\circ \leq 2\theta \leq 153.51^\circ$ ), 2691 unique ( $R_{\text{int}} = 0.0460$ ,  $R_{\text{sigma}} = 0.0203$ ) which were used in all calculations. The final  $R_1$  was 0.0379 ( $I > 2\sigma(I)$ ) and  $wR_2$  was 0.1089 (all data). The crystal structure is deposited at the Cambridge Crystallographic Data Centre (CCDC 1584785).

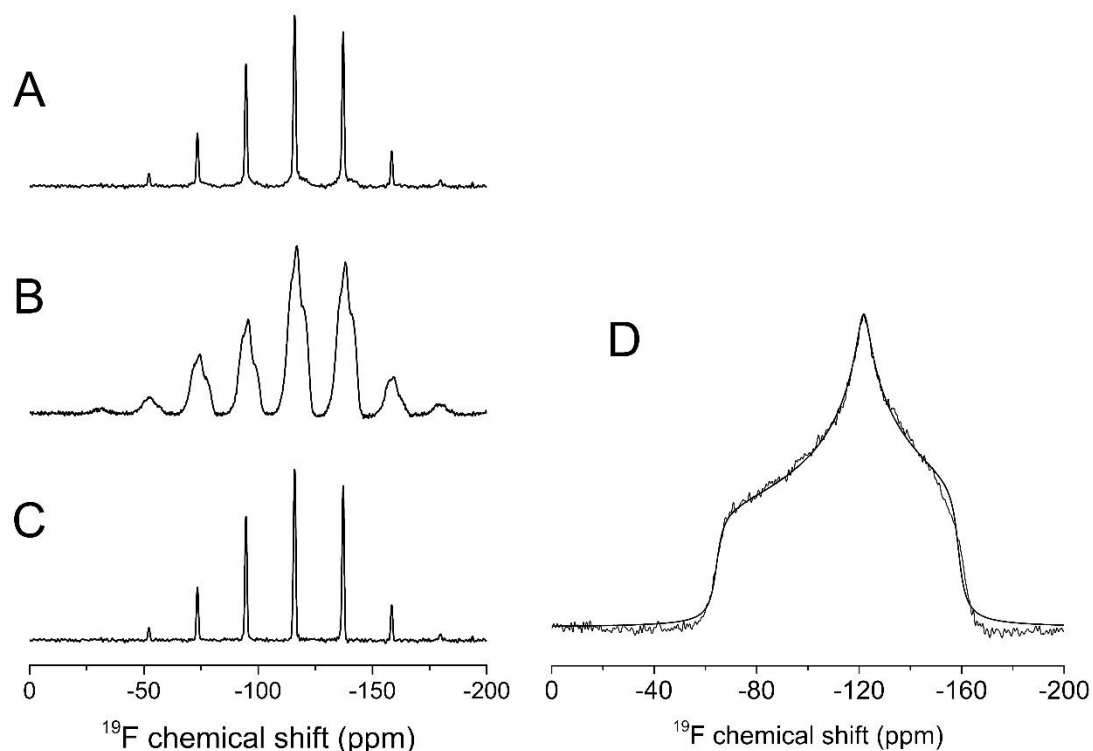

Figure S3. Proton-decoupled  $^{19}\text{F}$  solid-state NMR spectra of FBTA. Cross-polarisation magic-angle spinning (CP-MAS) spectra (obtained with 8 kHz sample spinning) are shown for (A) the FBTA methanol solvate recrystallised from methanol as for the X-ray analysis, (B) FBTA recrystallised from ethanol:water and (C) the methanol solvate after subtraction of the spectrum of the ethanol:water form (scaled appropriately) to remove the small broad component close to the base line. It is estimated that the broad component represents 5 % of the total FBTA. The spectrum of the ethanol:water form is consistent with  $Z' \geq 3$ . D: Static, non-spinning spectrum of the FBTA methanol solvate (corrected as described above) overlaid with the calculated best-fitting powder pattern corresponding to the CSA principal values in Table 1 of the main text.

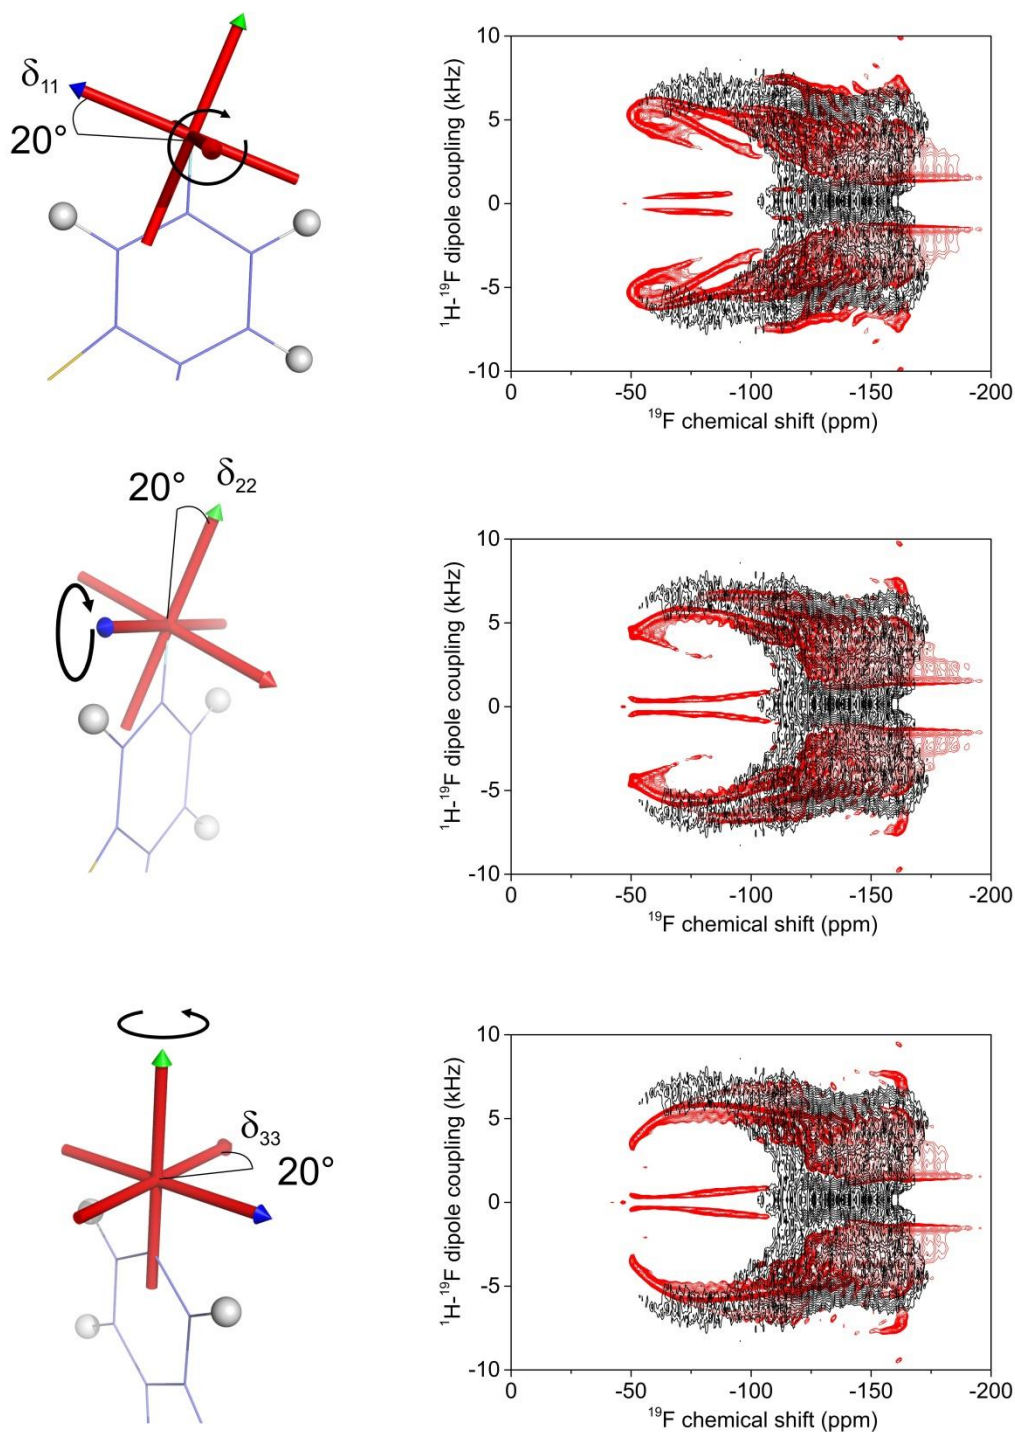

Figure S4. The experimental  $^1\text{H}$ - $^{19}\text{F}$  PISEMA spectrum (black) of FBTA in DMPC- $\text{d}_{54}$  bilayers (reproduced from the main text) overlaid with simulated spectra (red) for  $20^\circ$  excursions of each principal axis of the chemical shielding tensor from the positions calculated by CASTEP and shown in Figure 3 of the main text.

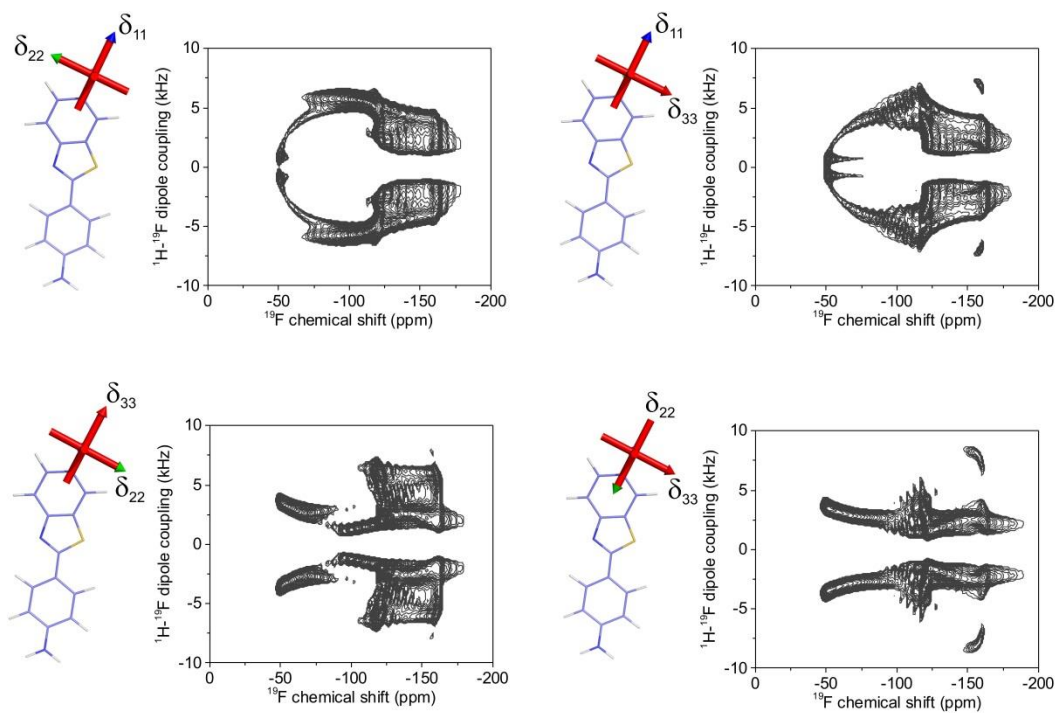

Figure S5. Simulated  $^1\text{H}$ - $^{19}\text{F}$  PISEMA spectra based on the  $^1\text{H}$ - $^{19}\text{F}$  dipole couplings and  $^{19}\text{F}$  CSA of FBTA, with  $\delta_{11}$  and  $\delta_{22}$  aligned along the C-F bond and with either  $\delta_{22}$  or  $\delta_{33}$  in the plane of the aromatic ring.

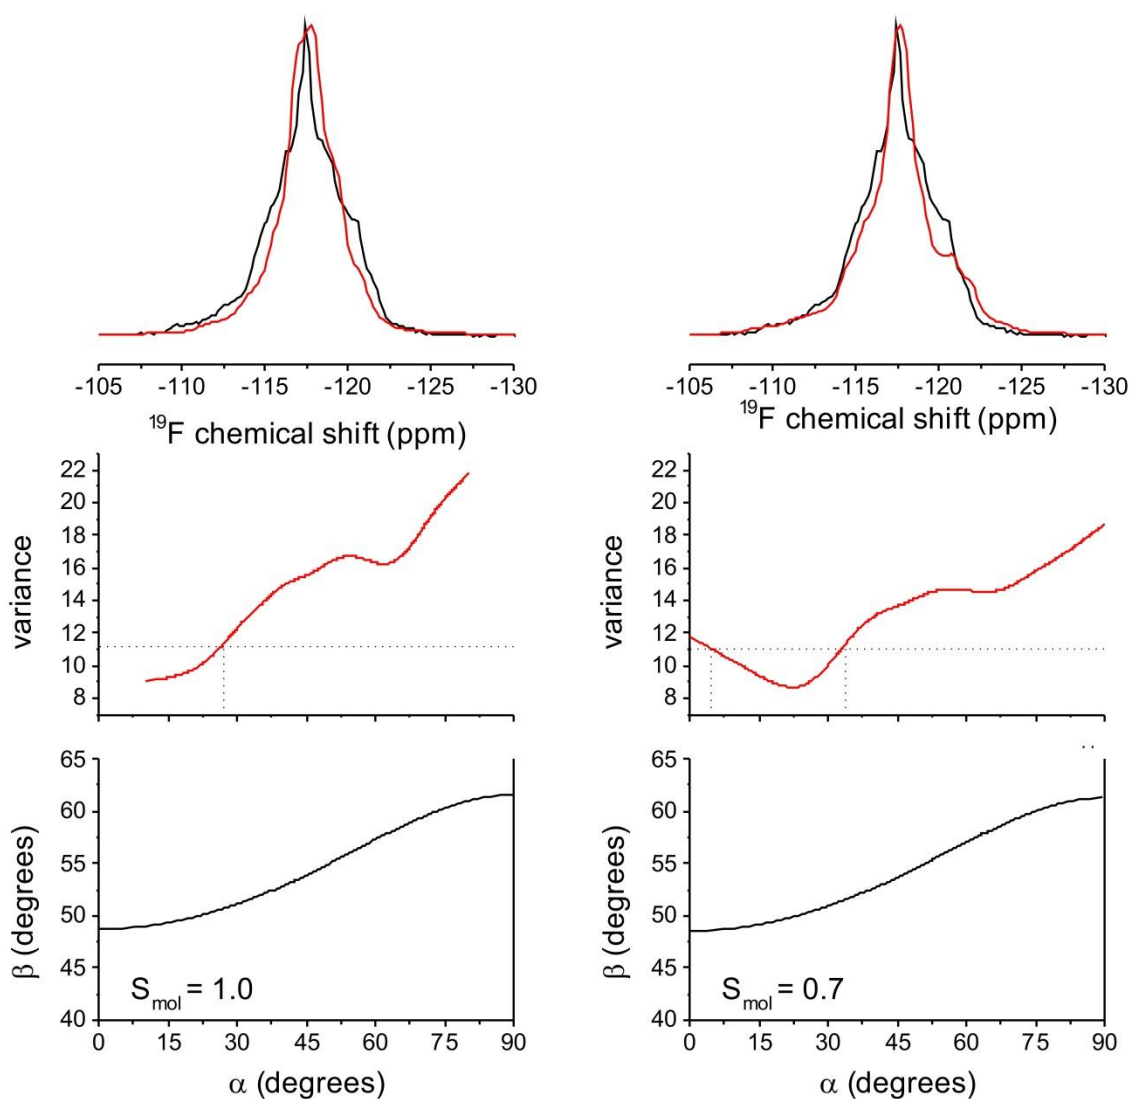

Figure S6. Bottom: a quadrant of the plot in Figure 2E of the main text, showing the combinations of angles  $\alpha$  and  $\beta$  consistent with the measure range of  $\Delta\delta_{av}$  of 1.05 - 1.25 ppm for different values of the order parameter  $S_{mol}$ . Middle: Plots of the variance (chi-square) of simulated proton-coupled  $^{19}\text{F}$  NMR spectra from the experimental spectrum for each permitted combination of  $\alpha$  and  $\beta$ . Top: The experimental spectrum (black) overlaid with the simulated spectra in closest agreement (corresponding to the minimum variance) at each value of  $S_{mol}$ . Chi-square values of less than 11 corresponded to the closest agreement with the data.

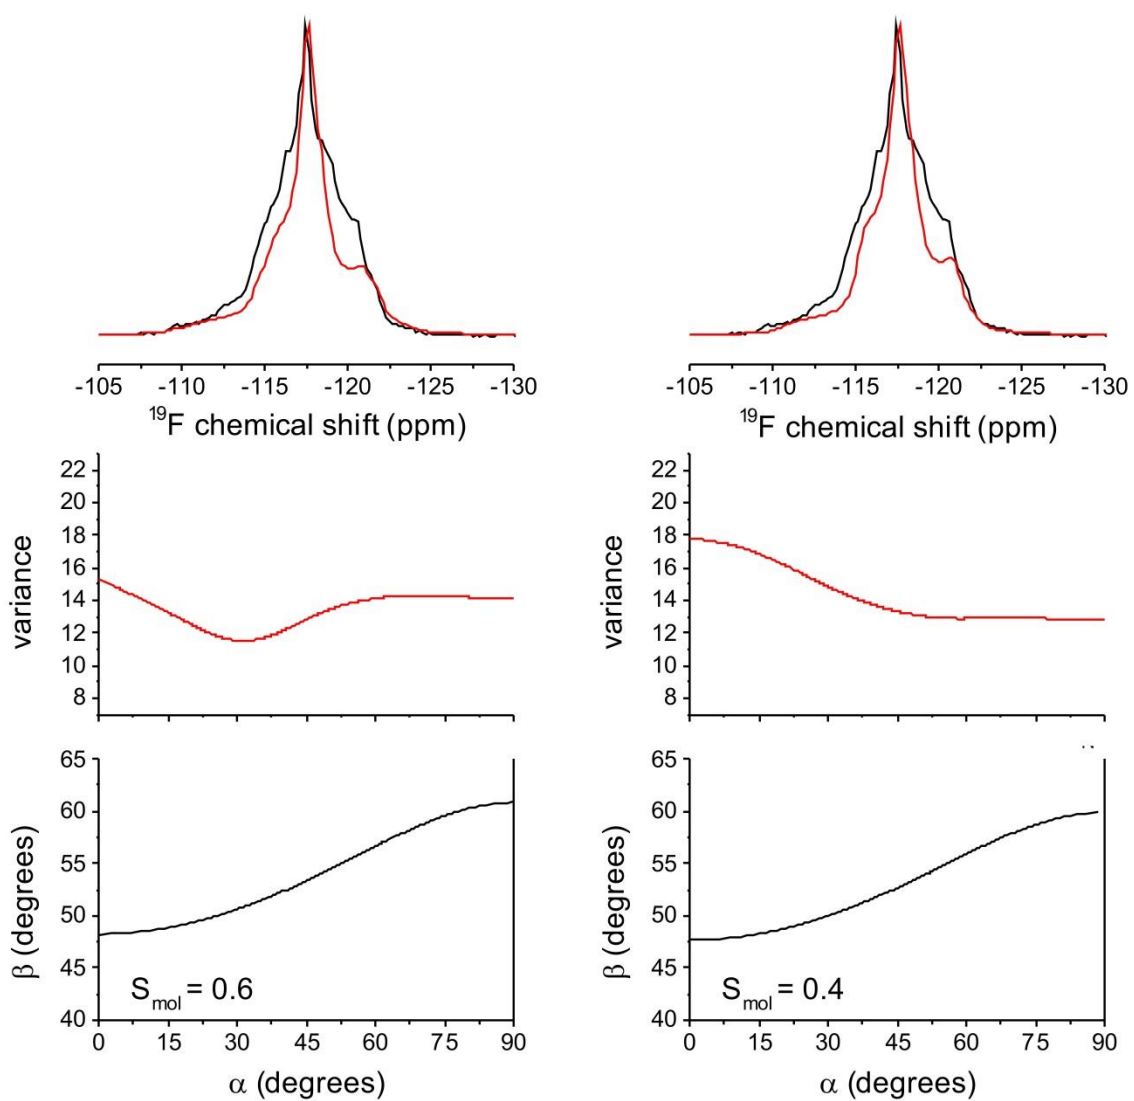

Figure S7. Continuation of Figure S6 for values of  $S_{\text{mol}}$  of 0.6 and 0.4. At  $S_{\text{mol}}$  values less than 0.7, the simulated spectra are noticeably narrower than the experimental spectra.



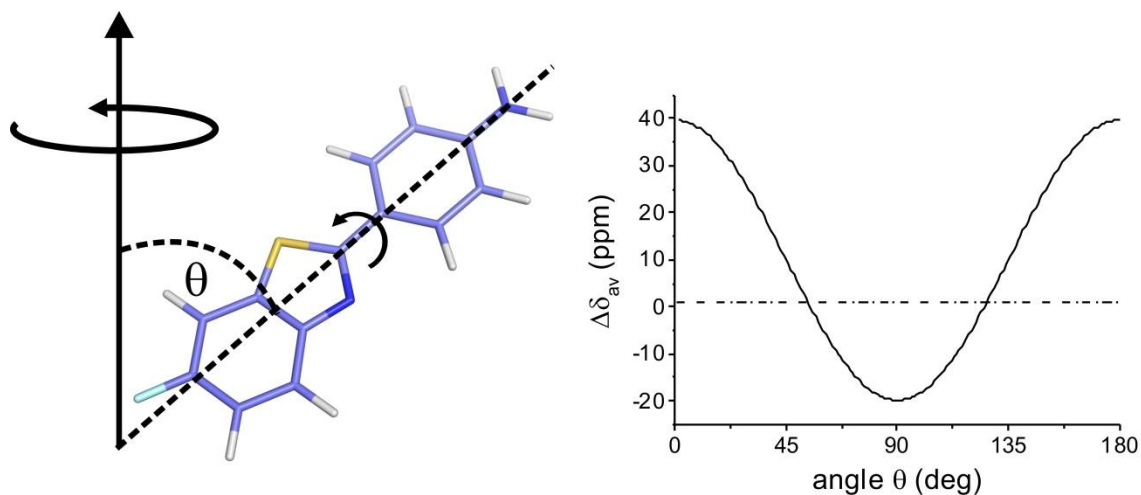

Figure S8. The effect of internal motion on the averaged  $^{19}\text{F}$  CSA,  $\Delta\delta_{av}$ . Rotation about the bond between the two ring systems was considered simultaneously with whole molecule rotation about an axis collinear with the bilayer normal. Internal rotation results in a scaled, axially symmetric CSA with the principal axis projected along the axis of internal rotation. Molecular rotation further averages the CSA by  $(3\cos^2\theta-1)/2$ , where  $\theta$  is the tilt angle of the molecule relative to the bilayer normal. Under these conditions (and assuming  $S_{mol} = 1.0$  in the first instance), the closest agreement with the observed  $\Delta\delta_{av}$  range of 1.05-1.25 ppm occurs when  $\theta = 51^\circ$  or  $129^\circ$ .
